# Supplementary material for: Determinants of Adherence in Time-Restricted Feeding in Older Adults: Lessons from a Pilot Study
Source: MDPI journal article supplement (doi:10.3390/nu12030874), 2020-03-24
Supplement: s1 [file s1]

Study # IRB201801293

Participant ID: \_\_\_\_\_

Caller: 

|  |  |  |
|--|--|--|
|  |  |  |
|--|--|--|

Date: \_\_\_\_/\_\_\_\_/\_\_\_\_ Intervention week \_\_\_\_

### Time to Eat pilot study – Weekly follow-up progress notes

Was the participant available? \_\_\_\_\_

Did the participant complete the entire interview? \_\_\_\_\_

#### Interview Questions

1. Have there been any changes in your health or lifestyle since the last time we have seen you  
(if first follow up call) / spoke?

---

---

2. How are you feeling *today*?

---

---

2a. How have you been feeling this *past week*?

---

---

3. Have you been completing the food diary we provided to you every day? YES / NO  
What was the first time you had food or drinks with calories? What was the last time you had food or drinks with calories?

| Week ____ | Time of 1 <sup>st</sup> caloric intake | Time of last caloric intake |
|-----------|----------------------------------------|-----------------------------|
| Day 1     |                                        |                             |
| Day 2     |                                        |                             |
| Day 3     |                                        |                             |
| Day 4     |                                        |                             |
| Day 5     |                                        |                             |
| Day 6     |                                        |                             |
| Day 7     |                                        |                             |

\* Note day of week

Study # IRB201801293

Participant ID: \_\_\_\_\_

Caller:

|  |  |  |
|--|--|--|
|  |  |  |
|--|--|--|

Date: \_\_\_\_/\_\_\_\_/\_\_\_\_ Intervention week \_\_\_\_

**IF NO.** Can you tell me what prevented you from completing the form?

---

4. Remind participant to follow the fasting chart provided at the first visit for allowed/restricted foods to ensure they are truly fasting.

---

---

5. Have you encountered any problems following this new eating pattern? If YES, help the participant identify specific challenges and potential solutions.

---

---

6. Do you have any questions for me at this time? Remind participant they can contact us if needed.

---

---

Additional comments:

---

---

---

Next call or final visit scheduled for: \_\_\_\_\_
