# Supplementary material for: Determinants of Adherence in Time-Restricted Feeding in Older Adults: Lessons from a Pilot Study
Source: MDPI journal article supplement (doi:10.3390/nu12030874), 2020-03-24
Supplement: s1 [file s1]

## Exit Interview

1. What was most helpful in getting you through the fasting periods?

---

---

---

---

---

2. What, if any, difficulty did you have adhering to intermittent fasting?

---

---

---

---

---

3. Could you think of any changes to the intermittent fasting eating pattern that would make it more feasible for people to practice?

---

---

---

---

---

4. Was there any aspect of the study that you liked?

---

---

---

---

---

Coordinator: 

|  |  |  |
|--|--|--|
|  |  |  |
|--|--|--|

Date: \_\_\_\_/\_\_\_\_/\_\_\_\_

5. Was there any aspect of the study that you did not like?

---

---

---

---

---

6. Do you think the amount of food you ate during the study was comparable to your normal intake?

Yes / No      *Comments:*

---

---

---

---

7. Would you be willing to participate in a future study in which you intermittently fast for longer than a month involving the same eating and fasting time periods each day?

Yes / No      *Comments:*

---

---

---

---

8. Would you be willing to participate in a similar future study which included intermittent fasting and a program to increase your level of activity throughout the day?

Yes / No      *Comments:*

---

---

---

---
